# Supplementary material for: A Network Analysis of Gender Differences in PTSD Symptoms among Chinese Adults during COVID‐19 Pandemic
Source: Hindawi journal article supplement (doi:10.1155/2024/6259982), 2024-01-01
Supplement: f1 [file 6259982.f1.docx]

Supplementary Figures


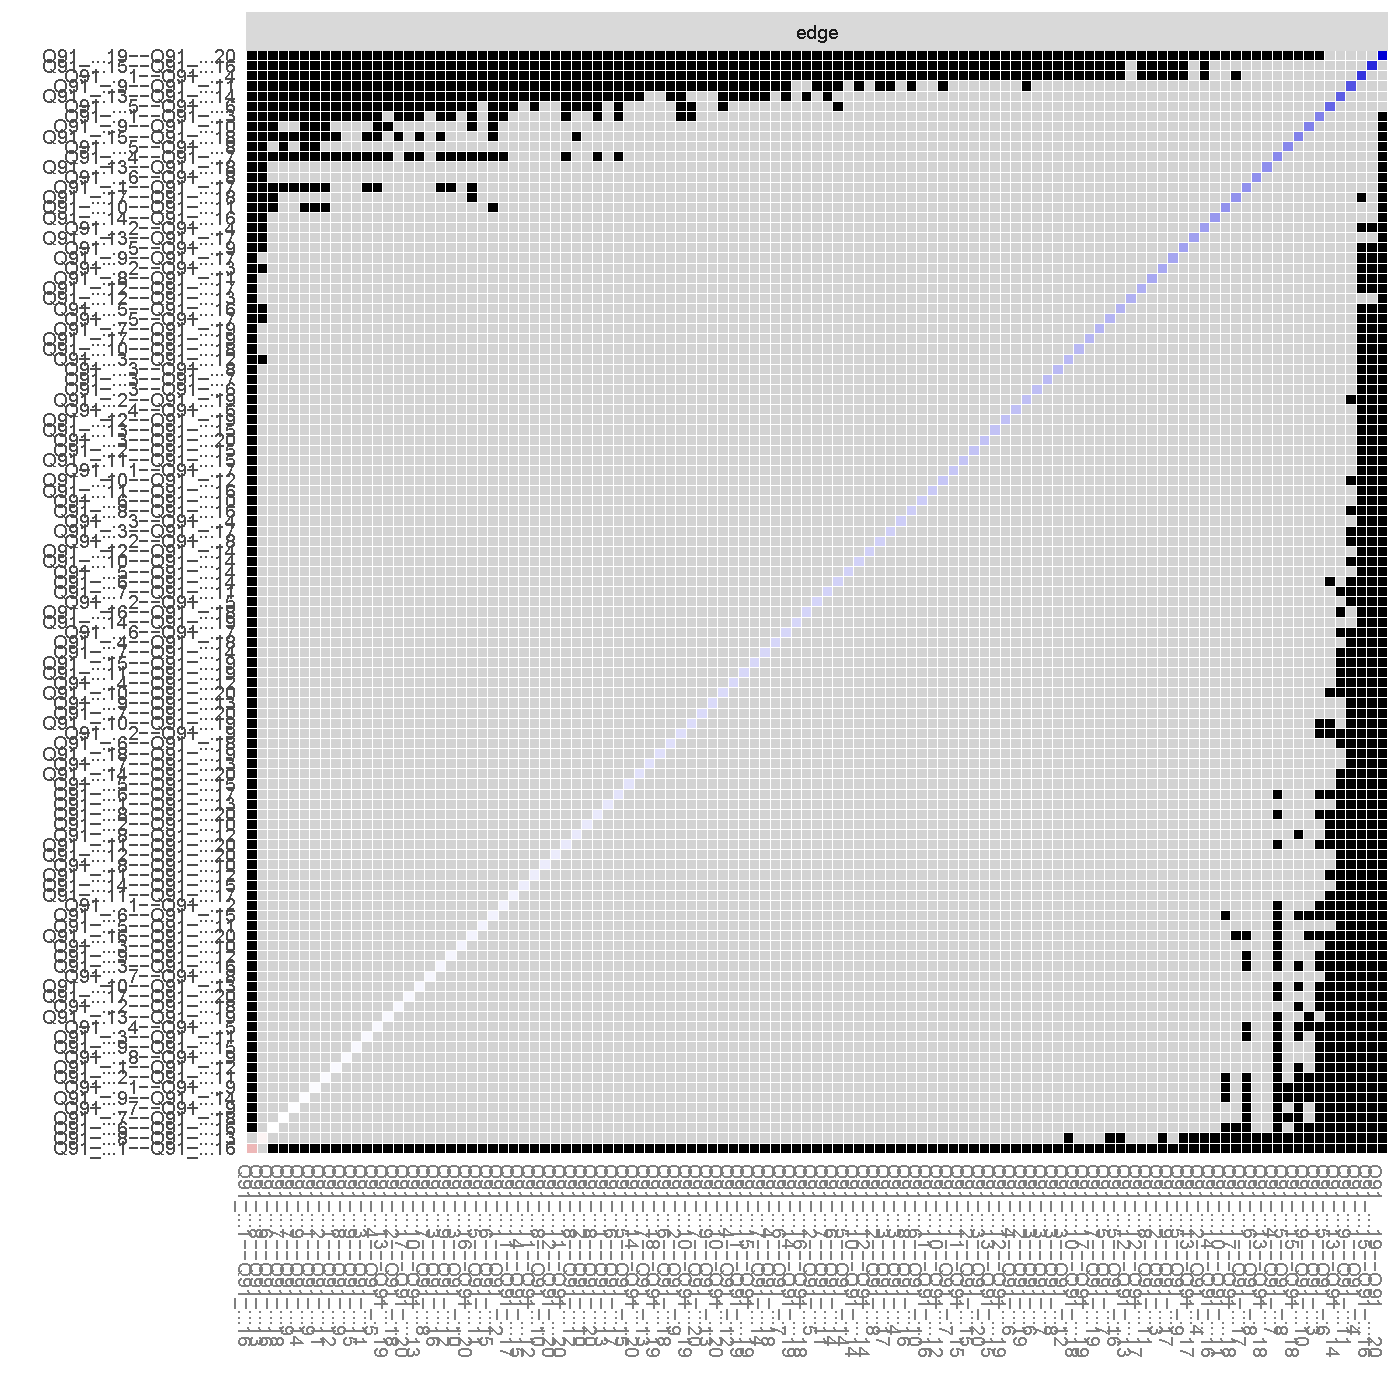


**Figure S1**. Bootstrap edge weights difference test between non-zero estimated edge weights in the network of 20 DSM-5 PTSD symptoms shown in Figure 1. Black boxes indicate a significant difference between two edges, gray indicate a non-significant difference. The color of the diagonal boxes (ranging from white to blue) corresponds to the thickness of the edge in Figure 1. 1 = Intrusive thoughts; 2 = Nightmares; 3 = Flashbacks; 4 = Emotional cue reactivity; 5 = Physiological cue reactivity; 6 = Avoidance of thoughts; 7 = Avoidance of reminders; 8 = Trauma-related amnesia; 9 = Negative belief; 10 = Blame of self or others; 11 = Negative trauma-related emotions; 12 = Loss of interest; 13 = Detachment; 14 = Restricted affect; 15 = Irritability; 16 = Self-destructive/reckless behavior; 17 = Hypervigilance; 18 = Exaggerated startle response; 19 = Difficulty concentrating; 20 = Sleep disturbance.


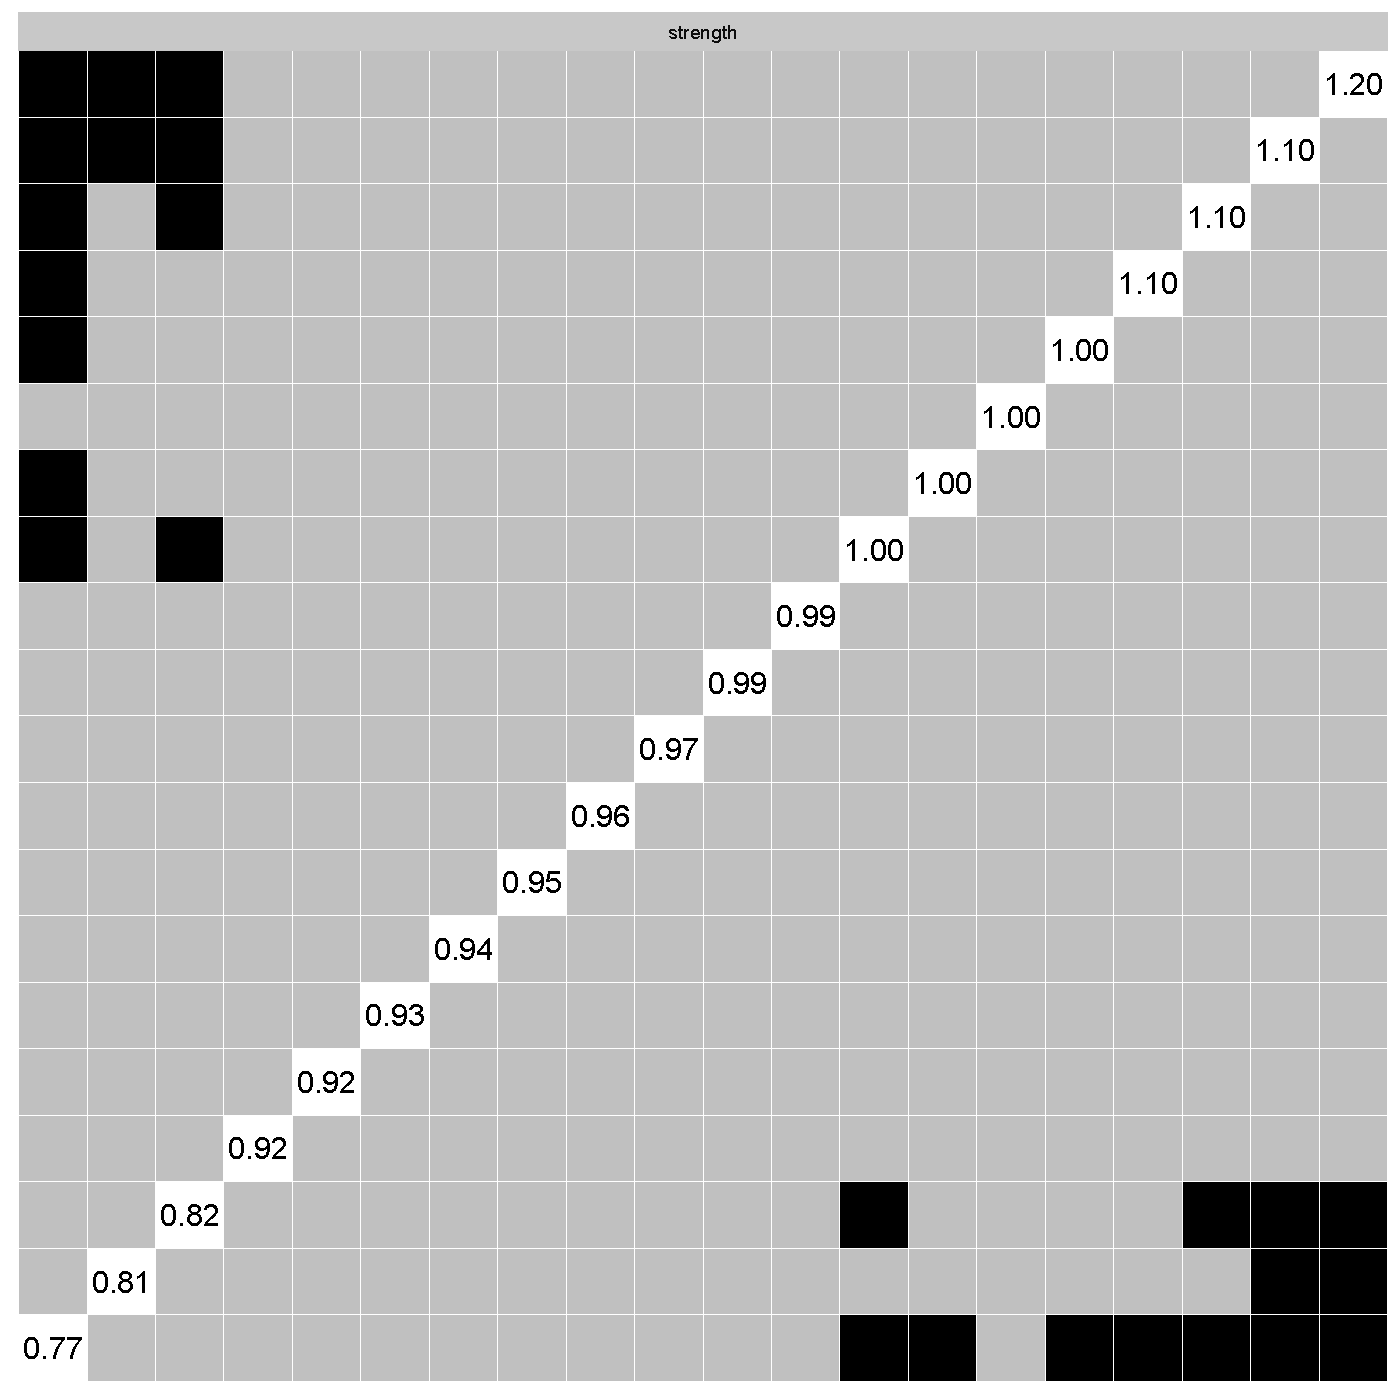


**Figure S2.** Bootstrap node strength difference test between node strength for the nodes of the network of 20 DSM-5 PTSD symptoms shown in Figure 1. Black boxes indicate a significant difference between two edges, gray indicate a non-significant difference.
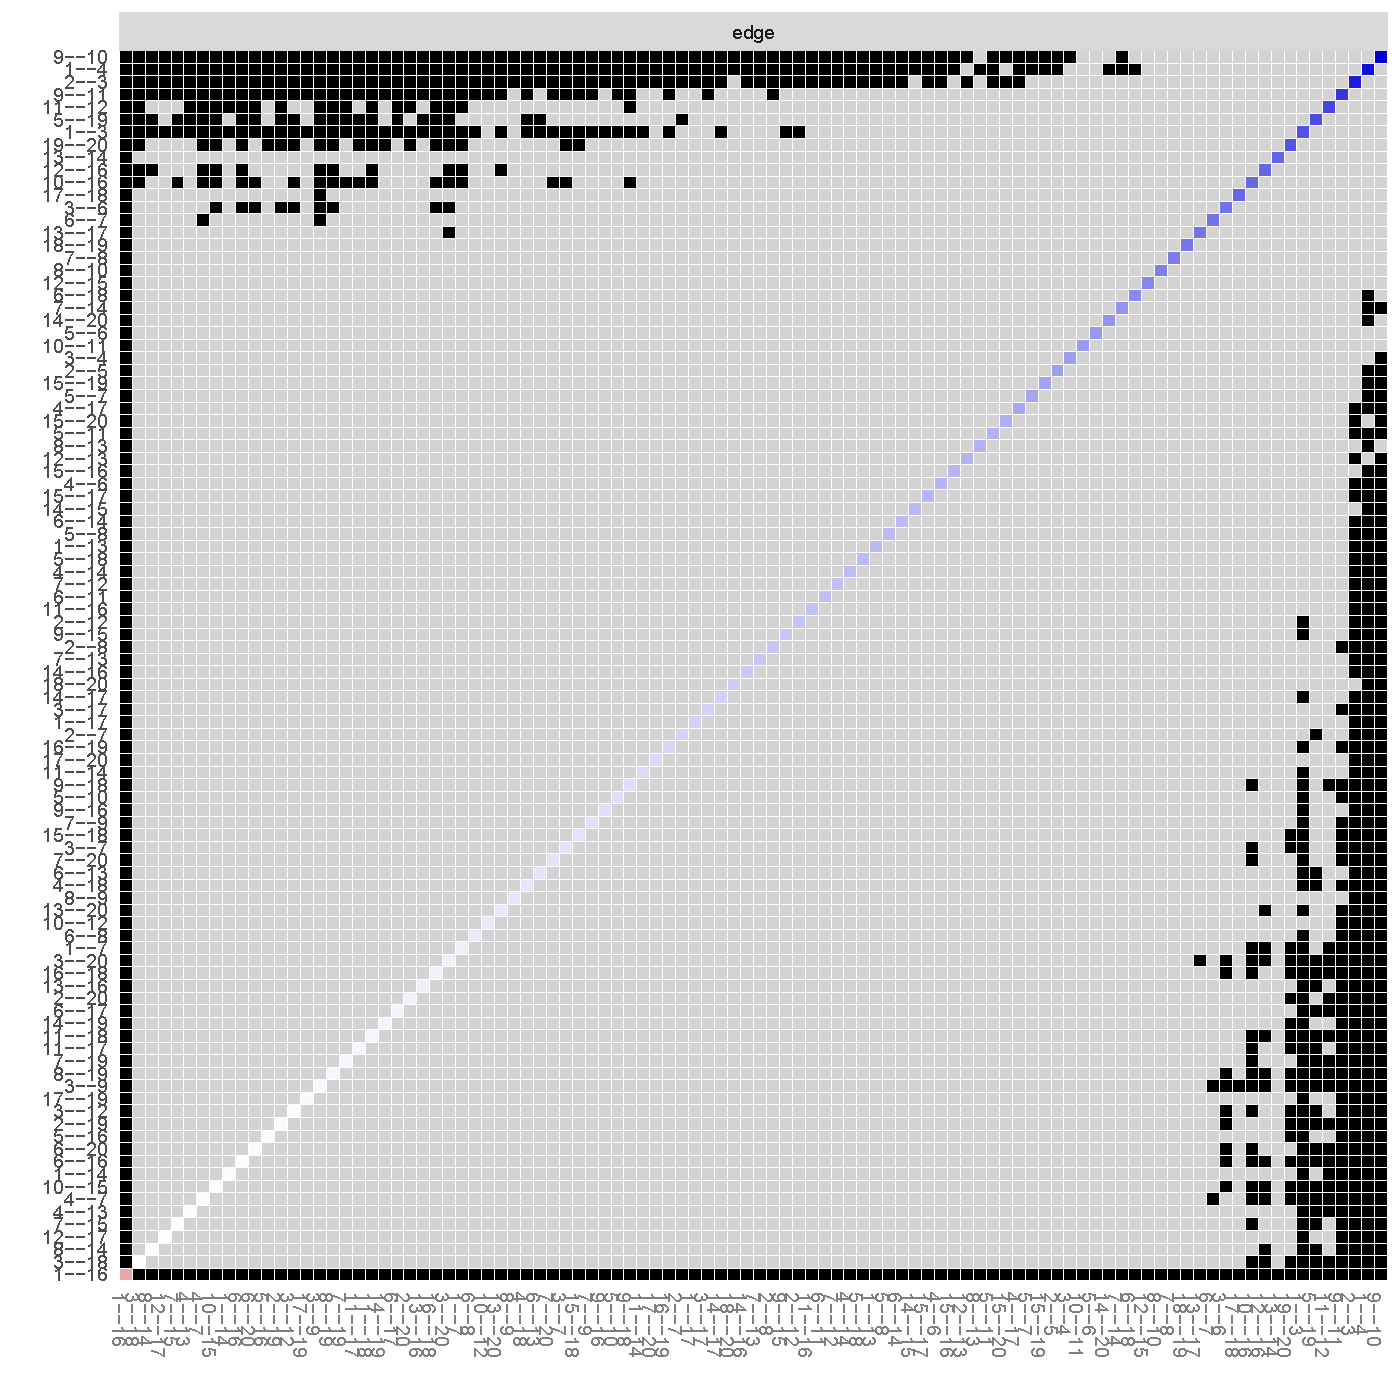


**Figure S3**. Bootstrap edge weights difference test between non-zero estimated edge weights in the network of 20 DSM-5 PTSD symptoms shown in Figure 2. Black boxes indicate a significant difference between two edges, gray indicate a non-significant difference. The color of the diagonal boxes (ranging from white to blue) corresponds to the thickness of the edge in Figure 1. 1 = Intrusive thoughts; 2 = Nightmares; 3 = Flashbacks; 4 = Emotional cue reactivity; 5 = Physiological cue reactivity; 6 = Avoidance of thoughts; 7 = Avoidance of reminders; 8 = Trauma-related amnesia; 9 = Negative belief; 10 = Blame of self or others; 11 = Negative trauma-related emotions; 12 = Loss of interest; 13 = Detachment; 14 = Restricted affect; 15 = Irritability; 16 = Self-destructive/reckless behavior; 17 = Hypervigilance; 18 = Exaggerated startle response; 19 = Difficulty concentrating; 20 = Sleep disturbance.


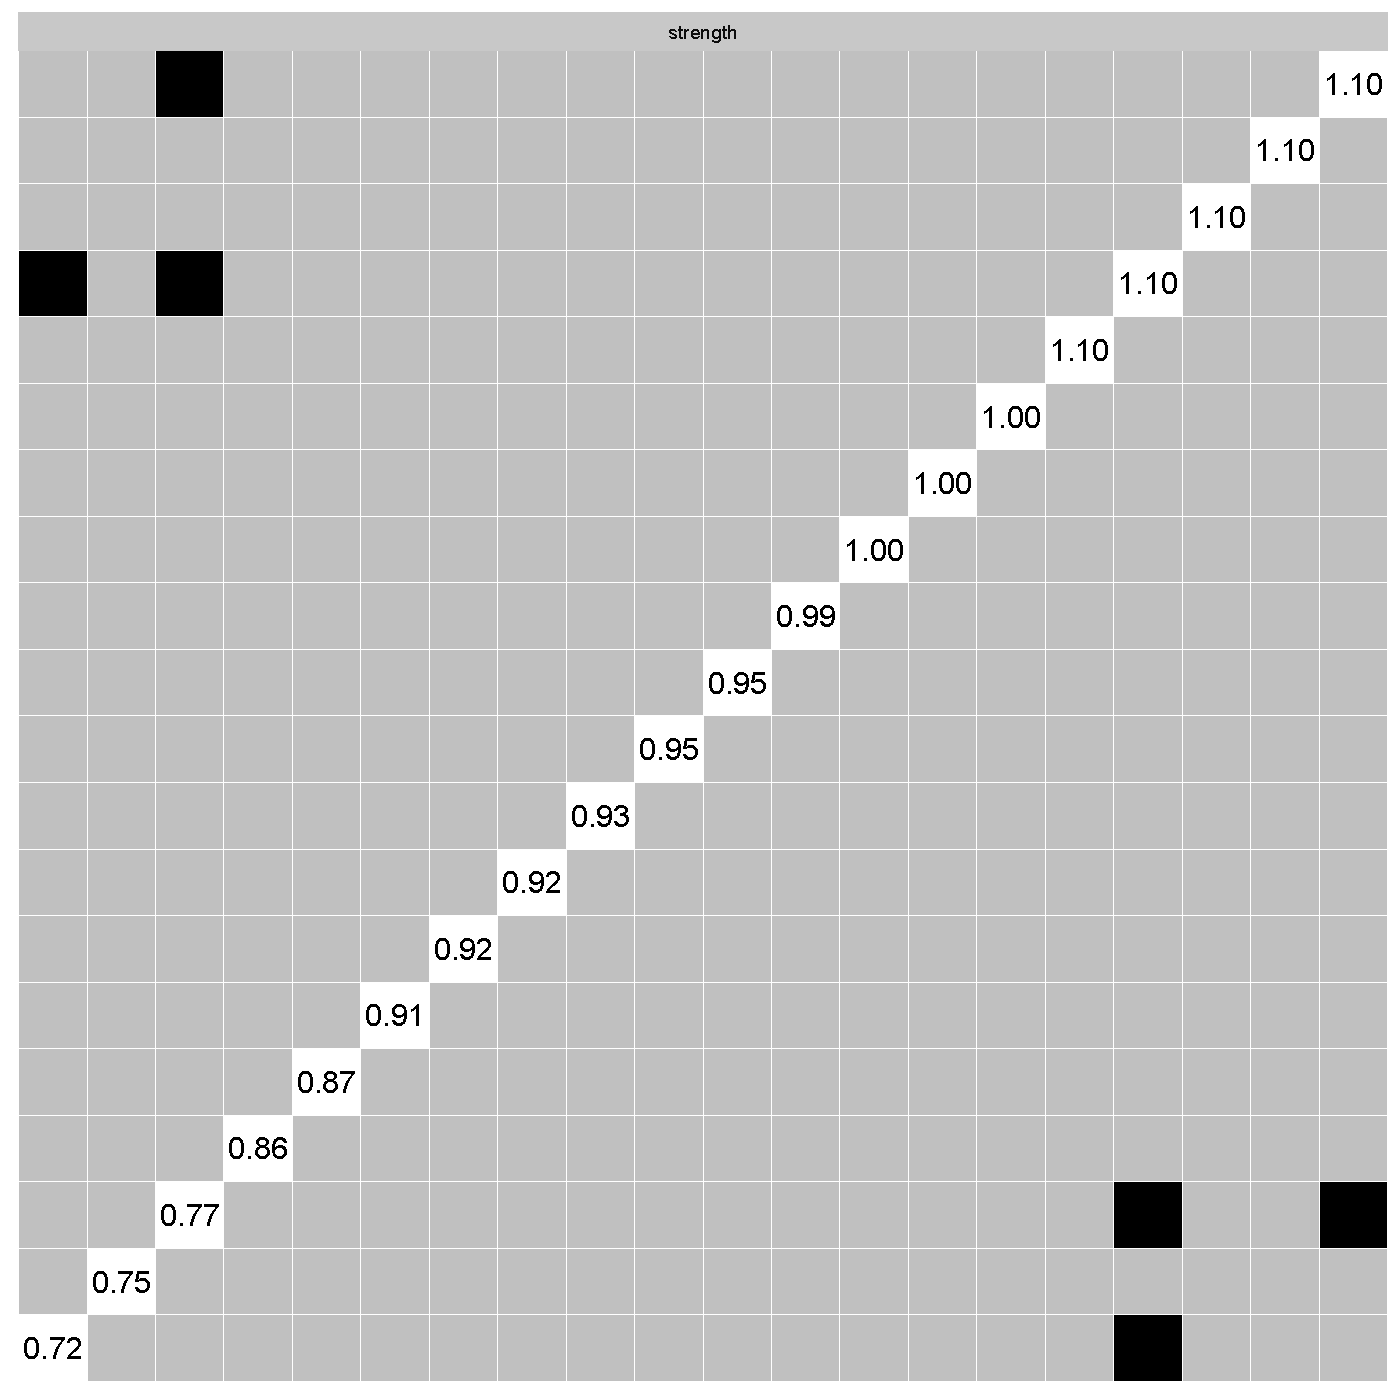


**Figure S4.** Bootstrap node strength difference test between node strength for the nodes of the network of 20 DSM-5 PTSD symptoms shown in Figure 2. Black boxes indicate a significant difference between two edges, gray indicate a non-significant difference.


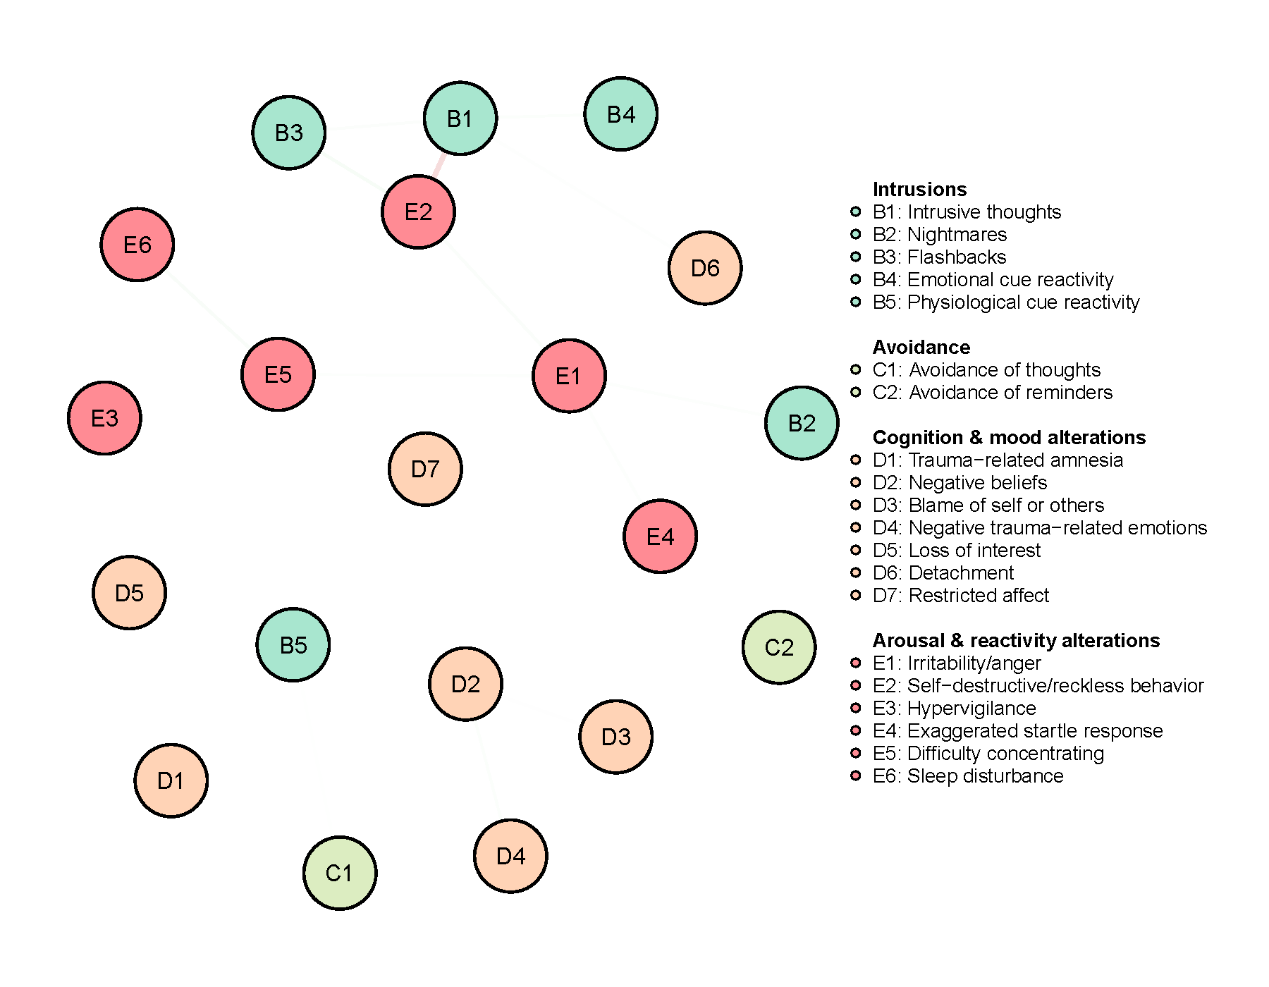


**Figure M3.** Estimated delta network of DSM-5 PTSD symptoms contains the change of PTSD symptoms network upon including covariate in male group.


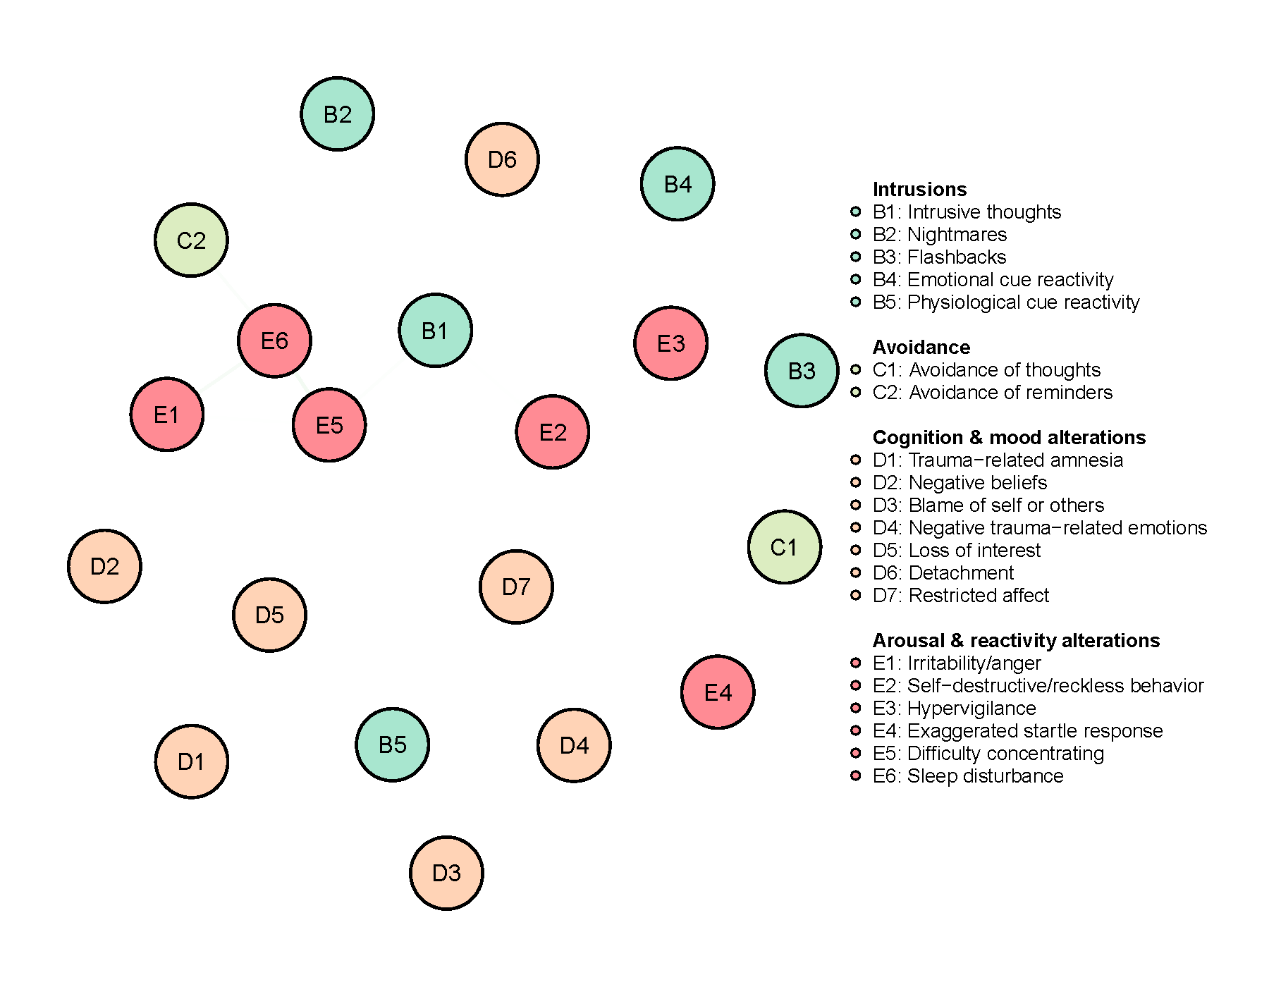
 **Figure F3.** Estimated delta network of DSM-5 PTSD symptoms contains the change of PTSD symptoms network upon including covariate in female group.


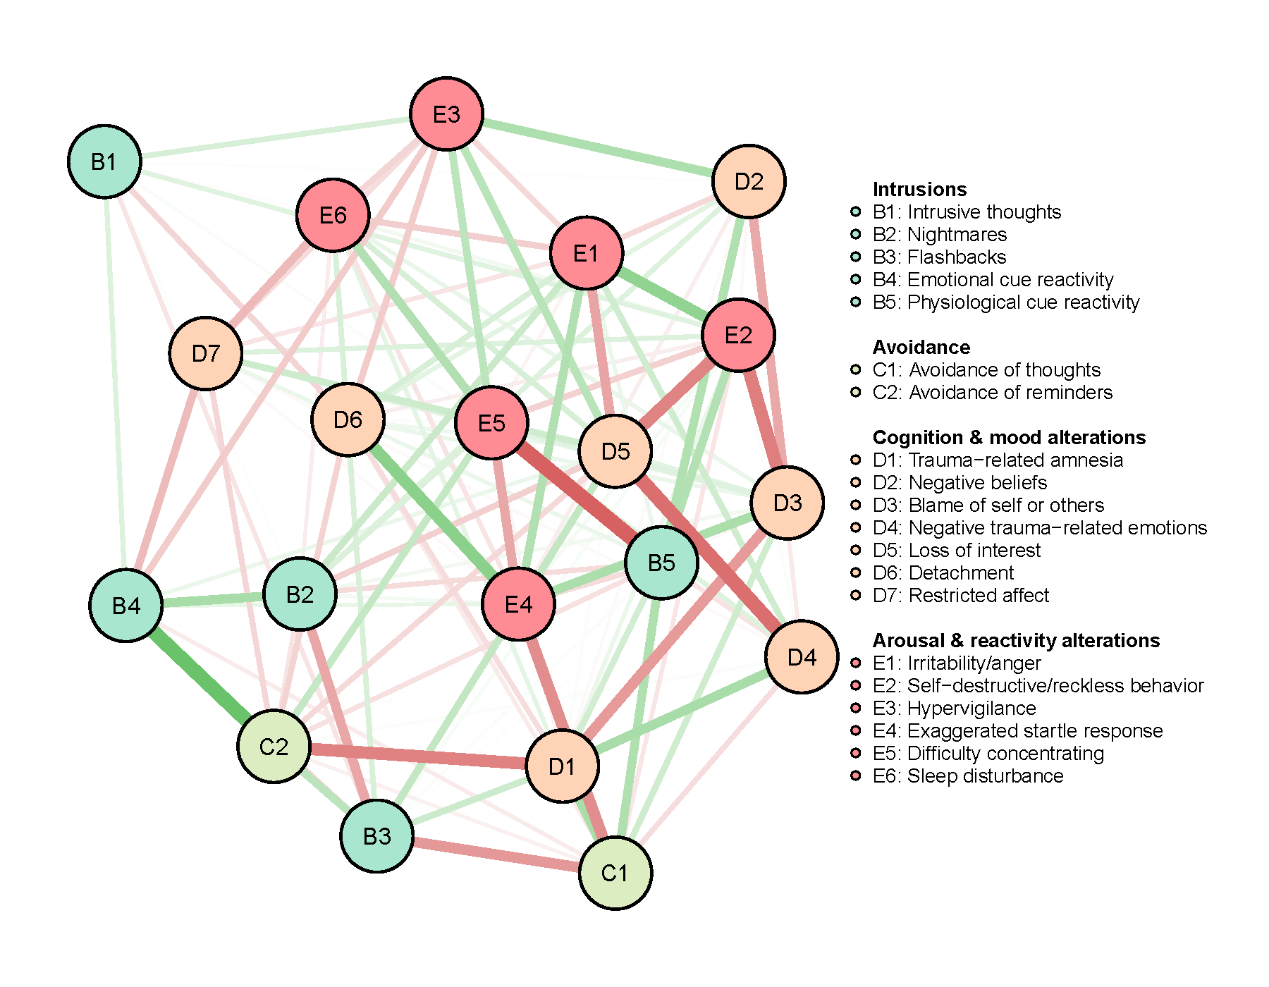


**Figure MF1.** Estimated delta network of DSM-5 PTSD symptoms between general group and PTSD sub-group.
